# Supplementary material for: The Homeodomain-Leucine Zipper Genes Family Regulates the Jinggangmycin Mediated Immune Response of Oryza sativa to Nilaparvata lugens, and Laodelphax striatellus
Source: MDPI journal article supplement (doi:10.3390/bioengineering9080398), 2022-08-17
Supplement: s1 [file s1]

# The Homeodomain-Leucine Zipper genes family regulate the response of *Oryza sativa* to *Nilaparvata lugens*, *Laodelphax striatellus*, and Jinggangmycin

Sheraz Ahmad<sup>1</sup>, Yu Chen<sup>1</sup>, Amir Zaman Shah<sup>1</sup>, Huaqi Wang<sup>1</sup>, Xi Chuanyuan<sup>1</sup>, Haowen Zhu<sup>1</sup> and Linquan Ge<sup>1</sup>

<sup>1</sup> College of Horticulture and Plant Protection, Yangzhou University, Yangzhou, China.

\*Correspondence: lqge@yzu.edu.cn

Table S1: Primer sequences for RT-qPCR.

| Genes          | Primer's sequence (5'to3')                                    |
|----------------|---------------------------------------------------------------|
| <i>OsHDZ3</i>  | F: GATCCAATCCATAAGGCCAAAC<br>R: CTCCGAAGACGAGTCCATTCATAC      |
| <i>OsHDZ4</i>  | F: GGTGTTGCTGTTCCGGTGAGGTGCT<br>R: TCCGCCGCTGCCTCGTCGTCGTA    |
| <i>OsHDZ10</i> | F: GCAGCAACCGCAGCGAGAATAGC<br>R: AGAACGGGATCATGCCGCCACC       |
| <i>OsHDZ15</i> | F: GCAGACGGAGGTGGACTGCGAGTT<br>R: GCGCTGGAGTTGTTATTGGTGTGGA   |
| <i>OsHDZ20</i> | F: TGAATGGCATGGGAGGGAGAAGC<br>R: GCGGCACATTGTCCATCGCGTAT      |
| <i>OsHDZ28</i> | F: TCGTCGGTGAAGGAGGAGGAGGACC<br>R: TTGAGAAGCTGCCCCGTGGAAGAACA |
| <i>OsHDZ37</i> | F: GCACTACGGCACATCAGACAAA<br>R: CACCCATGACAGACCAACCATC        |
| <i>OsHDZ40</i> | F: CGACGCAATACTGTGCTGTTCT<br>R: AGCGAGATGTCCTGGAGGTTGA        |
| <i>ACTIN</i>   | F: TCCATCTTGGCATCTCTCAG<br>R: GTACCCGCATCAGGCATCTG            |

Table S2: Types and number of cis-acting regulatory elements analysis involved in the growth and development, stress and hormonal response.

|                 | Site Name   | Function                                                                  |
|-----------------|-------------|---------------------------------------------------------------------------|
| <b>Hormones</b> | AuxRR-core  | <i>Cis</i> -acting regulatory element involved in auxin responsiveness    |
|                 | CGTCA-motif | <i>Cis</i> -acting regulatory element involved in the MeJA responsiveness |
|                 | CGTCA-motif | <i>Cis</i> -acting regulatory element involved in the MeJA responsiveness |
|                 | P-box       | gibberellin-responsive element                                            |
|                 | TCA-element | <i>Cis</i> -acting element involved in salicylic acid responsiveness      |
|                 | TCA-element | <i>Cis</i> -acting element involved in salicylic acid responsiveness      |
|                 | ABRE        | <i>Cis</i> -acting element involved in the abscisic acid responsiveness   |
|                 | GARE-motif  | gibberellin-responsive element                                            |
|                 | ABRE        | <i>Cis</i> -acting element involved in the abscisic acid responsiveness   |

|                   |                 |                                                                      |
|-------------------|-----------------|----------------------------------------------------------------------|
| Stress and growth | G-Box           | Cis-acting regulatory element involved in light responsiveness       |
|                   | G-Box           | Cis-acting regulatory element involved in light responsiveness       |
|                   | ATCT-motif      | part of a conserved DNA module involved in light responsiveness      |
|                   | ACE             | cis-acting element involved in light responsiveness                  |
|                   | GC-motif        | enhancer-like element involved in anoxic specific inducibility       |
|                   | ARE             | Cis-acting regulatory element essential for the anaerobic induction  |
|                   | MBS             | MYB binding site involved in drought-inducibility/resistance         |
|                   | TATA-Box        | core promoter element around -30 of transcription start              |
|                   | CAAT-box        | common cis-acting element in promoter and enhancer regions           |
|                   | LTR             | cis-acting element involved in low-temperature responsiveness        |
|                   | MBS1            | MYB binding site involved in flavonoid biosynthetic genes regulation |
|                   | TC-rich repeats | cis-acting element involved in defense and stress responsiveness     |
|                   | CAT-box         | cis-acting regulatory element related to meristem expression         |

Table S3: Domain distribution and structure of *OsHDZIP* genes in *Oryza sativa*.

| No | Motif Logo | Motif Sequence                                     |
|----|------------|----------------------------------------------------|
| 1  |            | LGLEPRQVKVWFQNRARWKTQ                              |
| 2  |            | RLTKEQVRALERSFKECPKLDPKQ                           |
| 3  |            | CRRLPSGCLIQEMPNGYSKVTWVEHVELD                      |
| 4  |            | LKRENEALREENRRL                                    |
| 5  |            | NGTJQLMYAELQVPSPLVPTREVWFLRYCKQLADG                |
| 6  |            | CTDASGSLVVYAPVDIPAMNVVMNGGDPSYVALLPSGFAL           |
| 7  |            | GGSLLTVAFQILVNSVPTAKLSLESVATVNSLIAC TIEKIK         |
| 8  |            | PERVDFDLRDESSRSEWDILSNGGVVQEMAHIKGRDHGNCVSL        |
| 9  |            | KEALSNA SCPCGGPAALGEMSFEHHLR IENARLKDEJDRISAJAAKYL |
| 10 |            | ITTEGRRSMLKLAERMVASFCAGVSASSAHZWTTLSGSG            |

Table S4 Predicted functional partners of *OsHDZIP* proteins

|                                |                                                                                                                                        |
|--------------------------------|----------------------------------------------------------------------------------------------------------------------------------------|
| RoC9                           | Homeobox-leucine zipper protein ROCP; Probable transcription factor; belongs to the HDZIP homeobox family. Class IV subfamily. (816aa) |
| Predicted functional partners: |                                                                                                                                        |
| Q3V826                         | Os02g0682500 protein                                                                                                                   |
| A0A0N7KLN2                     | Os02g0183800 protein                                                                                                                   |
| OSHAP3E                        | cDNA clone: 002-134-B07, full insert sequence                                                                                          |

|            |                                                                                                    |
|------------|----------------------------------------------------------------------------------------------------|
| Q0JAK5     | cDNA clone: J03305D05, full insert sequence                                                        |
| Q7F3D6     | cDNA clone: 002-141-A12, full insert sequence                                                      |
| LFL1       | B3 domain-containing protein LFL1; Transcription repressor involved in flowering time regulations. |
| Q8GVN6     | Os07g0531600 protein                                                                               |
| AP2-5      | APETALA2-like protein 5; Transcription factor. Involved in spikelet transition and development.    |
| A0A0P0VDU4 | Os02g0114400 protein                                                                               |
| A0A0P0WRG0 | Os05g0586300 protein                                                                               |
