# Supplementary material for: The Homeodomain-Leucine Zipper Genes Family Regulates the Jinggangmycin Mediated Immune Response of Oryza sativa to Nilaparvata lugens, and Laodelphax striatellus
Source: Bioengineering (Basel). 2022 Aug 17;9(8):398. doi: 10.3390/bioengineering9080398 (PMC9405480; doi:10.3390/bioengineering9080398)
Supplement: Supplementary file 1 [file bioengineering-09-00398-s001.zip › Supplementary Data Table S5. The detailed informations of the putative miRNAs targeted OsHDZ genes.xlsx]

## Sheet: Table S
Table S5. The detailed informations of the putative miRNAs targeted OsHDZ genes.
miRNA_Acc.	Target_Acc.	Expectation	UPE$	miRNA_start	miRNA_end	Target_start	Target_end	miRNA_aligned_fragment	alignment	Target_aligned_fragment	Inhibition	Target_Desc.	Multiplicity
osa-miR166a-3p	OsHDZ40	1	-1	1	21	602	622	UCGGACCAGGCUUCAUUCCCC	::.:::::::::::::::.	UUGGGAUGAAGCCUGGUCCGG	Cleavage		1
osa-miR166a-3p	OsHDZ37	1	-1	1	21	569	589	UCGGACCAGGCUUCAUUCCCC	::.:::::::::::::::.	CUGGGAUGAAGCCUGGUCCGG	Cleavage		1
osa-miR166a-3p	OsHDZ13	1	-1	1	21	611	631	UCGGACCAGGCUUCAUUCCCC	::.:::::::::::::::.	UUGGGAUGAAGCCUGGUCCGG	Cleavage		1
osa-miR166a-3p	OsHDZ9	1	-1	1	21	563	583	UCGGACCAGGCUUCAUUCCCC	::.:::::::::::::::.	CUGGGAUGAAGCCUGGUCCGG	Cleavage		1
osa-miR166b-3p	OsHDZ13	1	-1	1	21	611	631	UCGGACCAGGCUUCAUUCCCC	::.:::::::::::::::.	UUGGGAUGAAGCCUGGUCCGG	Cleavage		1
osa-miR166b-3p	OsHDZ9	1	-1	1	21	563	583	UCGGACCAGGCUUCAUUCCCC	::.:::::::::::::::.	CUGGGAUGAAGCCUGGUCCGG	Cleavage		1
osa-miR166b-3p	OsHDZ40	1	-1	1	21	602	622	UCGGACCAGGCUUCAUUCCCC	::.:::::::::::::::.	UUGGGAUGAAGCCUGGUCCGG	Cleavage		1
osa-miR166b-3p	OsHDZ37	1	-1	1	21	569	589	UCGGACCAGGCUUCAUUCCCC	::.:::::::::::::::.	CUGGGAUGAAGCCUGGUCCGG	Cleavage		1
osa-miR166c-3p	OsHDZ13	1	-1	1	21	611	631	UCGGACCAGGCUUCAUUCCCC	::.:::::::::::::::.	UUGGGAUGAAGCCUGGUCCGG	Cleavage		1
osa-miR166c-3p	OsHDZ9	1	-1	1	21	563	583	UCGGACCAGGCUUCAUUCCCC	::.:::::::::::::::.	CUGGGAUGAAGCCUGGUCCGG	Cleavage		1
osa-miR166c-3p	OsHDZ37	1	-1	1	21	569	589	UCGGACCAGGCUUCAUUCCCC	::.:::::::::::::::.	CUGGGAUGAAGCCUGGUCCGG	Cleavage		1
osa-miR166c-3p	OsHDZ40	1	-1	1	21	602	622	UCGGACCAGGCUUCAUUCCCC	::.:::::::::::::::.	UUGGGAUGAAGCCUGGUCCGG	Cleavage		1
osa-miR166d-3p	OsHDZ13	1	-1	1	21	611	631	UCGGACCAGGCUUCAUUCCCC	::.:::::::::::::::.	UUGGGAUGAAGCCUGGUCCGG	Cleavage		1
osa-miR166d-3p	OsHDZ9	1	-1	1	21	563	583	UCGGACCAGGCUUCAUUCCCC	::.:::::::::::::::.	CUGGGAUGAAGCCUGGUCCGG	Cleavage		1
osa-miR166d-3p	OsHDZ37	1	-1	1	21	569	589	UCGGACCAGGCUUCAUUCCCC	::.:::::::::::::::.	CUGGGAUGAAGCCUGGUCCGG	Cleavage		1
osa-miR166d-3p	OsHDZ40	1	-1	1	21	602	622	UCGGACCAGGCUUCAUUCCCC	::.:::::::::::::::.	UUGGGAUGAAGCCUGGUCCGG	Cleavage		1
osa-miR166f	OsHDZ37	1	-1	1	21	569	589	UCGGACCAGGCUUCAUUCCCC	::.:::::::::::::::.	CUGGGAUGAAGCCUGGUCCGG	Cleavage		1
osa-miR166f	OsHDZ9	1	-1	1	21	563	583	UCGGACCAGGCUUCAUUCCCC	::.:::::::::::::::.	CUGGGAUGAAGCCUGGUCCGG	Cleavage		1
osa-miR166f	OsHDZ13	1	-1	1	21	611	631	UCGGACCAGGCUUCAUUCCCC	::.:::::::::::::::.	UUGGGAUGAAGCCUGGUCCGG	Cleavage		1
osa-miR166f	OsHDZ40	1	-1	1	21	602	622	UCGGACCAGGCUUCAUUCCCC	::.:::::::::::::::.	UUGGGAUGAAGCCUGGUCCGG	Cleavage		1
osa-miR166g-3p	OsHDZ9	1	-1	1	21	563	583	UCGGACCAGGCUUCAUUCCUC	::.:::::::::::::::.	CUGGGAUGAAGCCUGGUCCGG	Cleavage		1
osa-miR166g-3p	OsHDZ37	1	-1	1	21	569	589	UCGGACCAGGCUUCAUUCCUC	::.:::::::::::::::.	CUGGGAUGAAGCCUGGUCCGG	Cleavage		1
osa-miR166g-3p	OsHDZ13	1	-1	1	21	611	631	UCGGACCAGGCUUCAUUCCUC	::.:::::::::::::::.	UUGGGAUGAAGCCUGGUCCGG	Cleavage		1
osa-miR166g-3p	OsHDZ40	1	-1	1	21	602	622	UCGGACCAGGCUUCAUUCCUC	::.:::::::::::::::.	UUGGGAUGAAGCCUGGUCCGG	Cleavage		1
osa-miR166h-3p	OsHDZ13	1	-1	1	21	611	631	UCGGACCAGGCUUCAUUCCUC	::.:::::::::::::::.	UUGGGAUGAAGCCUGGUCCGG	Cleavage		1
osa-miR166h-3p	OsHDZ40	1	-1	1	21	602	622	UCGGACCAGGCUUCAUUCCUC	::.:::::::::::::::.	UUGGGAUGAAGCCUGGUCCGG	Cleavage		1
osa-miR166h-3p	OsHDZ37	1	-1	1	21	569	589	UCGGACCAGGCUUCAUUCCUC	::.:::::::::::::::.	CUGGGAUGAAGCCUGGUCCGG	Cleavage		1
osa-miR166h-3p	OsHDZ9	1	-1	1	21	563	583	UCGGACCAGGCUUCAUUCCUC	::.:::::::::::::::.	CUGGGAUGAAGCCUGGUCCGG	Cleavage		1
osa-miR166j-3p	OsHDZ40	1	-1	1	21	602	622	UCGGACCAGGCUUCAUUCCCC	::.:::::::::::::::.	UUGGGAUGAAGCCUGGUCCGG	Cleavage		1
osa-miR166j-3p	OsHDZ9	1	-1	1	21	563	583	UCGGACCAGGCUUCAUUCCCC	::.:::::::::::::::.	CUGGGAUGAAGCCUGGUCCGG	Cleavage		1
osa-miR166j-3p	OsHDZ13	1	-1	1	21	611	631	UCGGACCAGGCUUCAUUCCCC	::.:::::::::::::::.	UUGGGAUGAAGCCUGGUCCGG	Cleavage		1
osa-miR166j-3p	OsHDZ37	1	-1	1	21	569	589	UCGGACCAGGCUUCAUUCCCC	::.:::::::::::::::.	CUGGGAUGAAGCCUGGUCCGG	Cleavage		1
osa-miR166m	OsHDZ9	1	-1	1	21	563	583	UCGGACCAGGCUUCAUUCCCU	::.:::::::::::::::.	CUGGGAUGAAGCCUGGUCCGG	Cleavage		1
osa-miR166m	OsHDZ40	1	-1	1	21	602	622	UCGGACCAGGCUUCAUUCCCU	::.:::::::::::::::.	UUGGGAUGAAGCCUGGUCCGG	Cleavage		1
osa-miR166m	OsHDZ37	1	-1	1	21	569	589	UCGGACCAGGCUUCAUUCCCU	::.:::::::::::::::.	CUGGGAUGAAGCCUGGUCCGG	Cleavage		1
osa-miR166m	OsHDZ13	1	-1	1	21	611	631	UCGGACCAGGCUUCAUUCCCU	::.:::::::::::::::.	UUGGGAUGAAGCCUGGUCCGG	Cleavage		1
osa-miR166i-3p	OsHDZ9	1.5	-1	1	21	563	583	UCGGAUCAGGCUUCAUUCCUC	::.::::::::::.::::.	CUGGGAUGAAGCCUGGUCCGG	Cleavage		1
osa-miR166i-3p	OsHDZ40	1.5	-1	1	21	602	622	UCGGAUCAGGCUUCAUUCCUC	::.::::::::::.::::.	UUGGGAUGAAGCCUGGUCCGG	Cleavage		1
osa-miR166i-3p	OsHDZ37	1.5	-1	1	21	569	589	UCGGAUCAGGCUUCAUUCCUC	::.::::::::::.::::.	CUGGGAUGAAGCCUGGUCCGG	Cleavage		1
osa-miR166i-3p	OsHDZ13	1.5	-1	1	21	611	631	UCGGAUCAGGCUUCAUUCCUC	::.::::::::::.::::.	UUGGGAUGAAGCCUGGUCCGG	Cleavage		1
osa-miR166k-3p	OsHDZ40	2	-1	1	21	602	622	UCGGACCAGGCUUCAAUCCCU	::. ::::::::::::::.	UUGGGAUGAAGCCUGGUCCGG	Cleavage		1
osa-miR166k-3p	OsHDZ37	2	-1	1	21	569	589	UCGGACCAGGCUUCAAUCCCU	::. ::::::::::::::.	CUGGGAUGAAGCCUGGUCCGG	Cleavage		1
osa-miR166k-3p	OsHDZ9	2	-1	1	21	563	583	UCGGACCAGGCUUCAAUCCCU	::. ::::::::::::::.	CUGGGAUGAAGCCUGGUCCGG	Cleavage		1
osa-miR166k-3p	OsHDZ13	2	-1	1	21	611	631	UCGGACCAGGCUUCAAUCCCU	::. ::::::::::::::.	UUGGGAUGAAGCCUGGUCCGG	Cleavage		1
osa-miR166l-3p	OsHDZ37	2	-1	1	21	569	589	UCGGACCAGGCUUCAAUCCCU	::. ::::::::::::::.	CUGGGAUGAAGCCUGGUCCGG	Cleavage		1
osa-miR166l-3p	OsHDZ13	2	-1	1	21	611	631	UCGGACCAGGCUUCAAUCCCU	::. ::::::::::::::.	UUGGGAUGAAGCCUGGUCCGG	Cleavage		1
osa-miR166l-3p	OsHDZ9	2	-1	1	21	563	583	UCGGACCAGGCUUCAAUCCCU	::. ::::::::::::::.	CUGGGAUGAAGCCUGGUCCGG	Cleavage		1
osa-miR166l-3p	OsHDZ40	2	-1	1	21	602	622	UCGGACCAGGCUUCAAUCCCU	::. ::::::::::::::.	UUGGGAUGAAGCCUGGUCCGG	Cleavage		1
osa-miR166e-3p	OsHDZ13	2.5	-1	1	21	611	631	UCGAACCAGGCUUCAUUCCCC	::.:::::::::::: ::.	UUGGGAUGAAGCCUGGUCCGG	Cleavage		1
osa-miR166e-3p	OsHDZ9	2.5	-1	1	21	563	583	UCGAACCAGGCUUCAUUCCCC	::.:::::::::::: ::.	CUGGGAUGAAGCCUGGUCCGG	Cleavage		1
osa-miR166e-3p	OsHDZ40	2.5	-1	1	21	602	622	UCGAACCAGGCUUCAUUCCCC	::.:::::::::::: ::.	UUGGGAUGAAGCCUGGUCCGG	Cleavage		1
osa-miR166e-3p	OsHDZ37	2.5	-1	1	21	569	589	UCGAACCAGGCUUCAUUCCCC	::.:::::::::::: ::.	CUGGGAUGAAGCCUGGUCCGG	Cleavage		1
osa-miR414	OsHDZ13	3.5	-1	1	21	1308	1328	UCAUCCUCAUCAUCAUCGUCC	.:::::.:: ::::::::	CAGCGAUGGUGCUGAGGAUGU	Translation		1
osa-miR5154	OsHDZ9	3.5	-1	1	24	2489	2512	AGCACCAGUUGACGUGACGCUGAG	.::. ::::::::::: ::	CCUUCUGUUUCGUCAACUGGUCCU	Cleavage		1
osa-miR1854-3p	OsHDZ9	4	-1	1	22	341	362	UCCAAUUUGGGGAUUUGCUGAU	::::..::.:: ::::::	AGAAGCAGGUCUCCCAAUUGGU	Cleavage		1
osa-miR408-5p	OsHDZ37	4	-1	1	21	1465	1485	CAGGGAUGAGGCAGAGCAUGG	::: .:: ::.:::::.:::	GCAUAUUCAGCUUCAUCUCUG	Cleavage		1
osa-miR444b.2	OsHDZ9	4	-1	1	21	375	395	UGCAGUUGUUGUCUCAAGCUU	: :: ::::.::.:::::	CCACAUGCGACAGCAGCUGCA	Cleavage		1
osa-miR444c.2	OsHDZ9	4	-1	1	21	375	395	UGCAGUUGUUGUCUCAAGCUU	: :: ::::.::.:::::	CCACAUGCGACAGCAGCUGCA	Cleavage		1
osa-miR5075	OsHDZ37	4	-1	1	21	37	57	UUCUCCGUCGCCGCCGUCCGC	::::::::::.::: :..	AGCGACGGCGGCGGCGGCGGG	Cleavage		2
osa-miR159f	OsHDZ9	4.5	-1	1	21	479	499	CUUGGAUUGAAGGGAGCUCUA	:.:::::.::::::. ::	CUGGGCUCCUUUCAAUUGCAG	Cleavage		1
osa-miR1847.1	OsHDZ40	4.5	-1	1	21	271	291	UGCAGUUUGCAGUUGUGGCAC	.: :..::::::::::..	GCCUCCCGGCUGCAAACUGUG	Cleavage		1
osa-miR1883a	OsHDZ37	4.5	-1	1	24	1243	1266	ACCUGUGACGGGCCGAGAAUGGAA	:: :.::.:.::::..:::	GAUGAUGGUUGGUCUGUCAUGGGU	Cleavage		1
osa-miR1883b	OsHDZ37	4.5	-1	1	24	1243	1266	ACCUGUGACGGGCCGAGAAUGGAA	:: :.::.:.::::..:::	GAUGAUGGUUGGUCUGUCAUGGGU	Cleavage		1
osa-miR5158	OsHDZ9	4.5	-1	1	24	1536	1559	UGAGCCACUGGGAUGAGGAUGAAU	::: ::::.::: : :::::	CCAAAUCAUCAUUCCACUUGCUCA	Cleavage		1
osa-miR5340	OsHDZ40	4.5	-1	1	23	758	781	UGAUGACGUGGAUGA-AUUUCAAA	:.:: :::::::.::.:::	GCGUAGAUAUCAUCCAUGUUAUCC	Cleavage		1
osa-miR5508	OsHDZ37	4.5	-1	1	21	1817	1837	UAGAUGGCUGAUCUGGUGUGG	:::..::::. : ::::::	GAACAUUAGAUUUGGCAUCUA	Cleavage		1
osa-miR5508	OsHDZ9	4.5	-1	1	21	1811	1831	UAGAUGGCUGAUCUGGUGUGG	:::..::::. : ::::::	GGACAUUAGAUUUGGCAUCUA	Cleavage		1
osa-miR5832	OsHDZ37	4.5	-1	1	21	166	186	UUGGCGGAGCGGUUGCUGUCA	: :::::.:.::::::: :	CGCCAGCAGCUGCUCCGCGAC	Cleavage		1
osa-miR815a	OsHDZ9	4.5	-1	1	21	1908	1930	AAGGGGAUUGAGGA--GAUUGGG	:.::: :..:::::.:::::	GACGAUCGCUUUUCAAUUCCCUU	Cleavage		1
osa-miR815b	OsHDZ9	4.5	-1	1	21	1908	1930	AAGGGGAUUGAGGA--GAUUGGG	:.::: :..:::::.:::::	GACGAUCGCUUUUCAAUUCCCUU	Cleavage		1
osa-miR815c	OsHDZ9	4.5	-1	1	21	1908	1930	AAGGGGAUUGAGGA--GAUUGGG	:.::: :..:::::.:::::	GACGAUCGCUUUUCAAUUCCCUU	Cleavage		1
osa-miR1429-3p	OsHDZ13	5	-1	1	21	822	842	GUUGCACGGGUUUGUAUGUUG	: ::::.::.::.. :::: :	CUACAUGCAGACUUAUGCACC	Cleavage		1
osa-miR159a.1	OsHDZ9	5	-1	1	21	479	500	UUUG-GAUUGAAGGGAGCUCUG	: :.:::::.::::::. ::.:	CUGGGCUCCUUUCAAUUGCAGA	Cleavage		1
osa-miR159b	OsHDZ9	5	-1	1	21	479	500	UUUG-GAUUGAAGGGAGCUCUG	: :.:::::.::::::. ::.:	CUGGGCUCCUUUCAAUUGCAGA	Cleavage		1
osa-miR164a	OsHDZ13	5	-1	1	21	1749	1769	UGGAGAAGCAGGGCACGUGCA	::::.:::::: :::: ::.	UGCAUGUGCCCAGCUUGUCUU	Translation		1
osa-miR164b	OsHDZ13	5	-1	1	21	1749	1769	UGGAGAAGCAGGGCACGUGCA	::::.:::::: :::: ::.	UGCAUGUGCCCAGCUUGUCUU	Translation		1
osa-miR164d	OsHDZ13	5	-1	1	21	1749	1769	UGGAGAAGCAGGGCACGUGCU	:::.:::::: :::: ::.	UGCAUGUGCCCAGCUUGUCUU	Translation		1
osa-miR164e	OsHDZ13	5	-1	1	21	1749	1769	UGGAGAAGCAGGGCACGUGAG	::.:::::: :::: ::.	UGCAUGUGCCCAGCUUGUCUU	Translation		1
osa-miR164f	OsHDZ13	5	-1	1	21	1749	1769	UGGAGAAGCAGGGCACGUGCA	::::.:::::: :::: ::.	UGCAUGUGCCCAGCUUGUCUU	Translation		1
osa-miR169r-3p	OsHDZ13	5	-1	1	21	540	561	UGGCAA-GUCUCCUCGGCUACC	::::.:::::::: ::: ::	UAUAGCUGAGGAGACCUUGGCA	Cleavage		1
osa-miR1850.2	OsHDZ9	5	-1	1	21	796	816	UUGUGUGUGAACUAAACGUGG	:: :::::::: ..:::.:	ACAACUUUAGUUCCUGCACGA	Cleavage		1
osa-miR1865-3p	OsHDZ40	5	-1	1	24	1065	1088	CGAAGAAUCGCAGUCACUAGUUGU	::: ::: :.:::::::	UUGGAGUGUGCCUGAGGUUCUUCG	Translation		1
osa-miR2093-5p	OsHDZ9	5	-1	1	20	347	366	GUGCAUUAAUUGGAAGAACA	: ::: ::::::..: ::.	AGGUCUCCCAAUUGGUUCAU	Cleavage		1
osa-miR2275d	OsHDZ40	5	-1	1	22	318	339	CUUGUUUUUCUCCAAUAUCUCA	: :. :::::.::::..:	GCUGUUGAUGGAGGAAAAUGAC	Cleavage		1
osa-miR2275d	OsHDZ13	5	-1	1	22	330	351	CUUGUUUUUCUCCAAUAUCUCA	:::. :::::: .:::.:	GUUGAUGGAGGAGAAUGACAGG	Cleavage		1
osa-miR2877	OsHDZ13	5	-1	1	24	1307	1330	UUGCAUCCUCUGCACUUUGGGCCU	: : .:::: :::::::..:	GCAGCGAUGGUGCUGAGGAUGUGA	Translation		1
osa-miR2927	OsHDZ13	5	-1	1	23	2520	2542	UGUCGUCGUCGAUGGAGCCCAUG	: :: : . : :::::::::::	GAAGGUCCUGAGCGACGACGACA	Cleavage		1
osa-miR395f	OsHDZ9	5	-1	1	21	346	366	GUGAAUUGUUUGGGGGAACUC	:: ::.::::: ...::::.	CAGGUCUCCCAAUUGGUUCAU	Cleavage		1
osa-miR444a-3p.2	OsHDZ9	5	-1	1	21	375	395	UGCAGUUGCUGCCUCAAGCUU	: :: : :::::.:::::	CCACAUGCGACAGCAGCUGCA	Cleavage		1
osa-miR444a-3p.2	OsHDZ37	5	-1	1	21	381	401	UGCAGUUGCUGCCUCAAGCUU	: ::: ::::::::: ::	GUACAUGAAGCAGCAACUUCA	Cleavage		1
osa-miR444a-3p.2	OsHDZ13	5	-1	1	21	390	410	UGCAGUUGCUGCCUCAAGCUU	: :: :::::::.:: ::	GUACAUGCGGCAGCAGCUCCA	Cleavage		1
osa-miR444b.1	OsHDZ13	5	-1	1	21	2329	2349	UGUUGUCUCAAGCUUGCUGCC	:. :: ::: :::::.::.	CUCGACAUGCUGGAGACGACG	Translation		1
osa-miR444b.1	OsHDZ40	5	-1	1	21	2308	2328	UGUUGUCUCAAGCUUGCUGCC	:. :: ::::::::.::.	CUCGACAUCCUUGAGACGACG	Cleavage		1
osa-miR444c.1	OsHDZ13	5	-1	1	21	2329	2349	UGUUGUCUCAAGCUUGCUGCC	:. :: ::: :::::.::.	CUCGACAUGCUGGAGACGACG	Translation		1
osa-miR444c.1	OsHDZ40	5	-1	1	21	2308	2328	UGUUGUCUCAAGCUUGCUGCC	:. :: ::::::::.::.	CUCGACAUCCUUGAGACGACG	Cleavage		1
osa-miR444d.2	OsHDZ9	5	-1	1	21	375	395	UGCAGUUGCUGCCUCAAGCUU	: :: : :::::.:::::	CCACAUGCGACAGCAGCUGCA	Cleavage		1
osa-miR444d.2	OsHDZ37	5	-1	1	21	381	401	UGCAGUUGCUGCCUCAAGCUU	: ::: ::::::::: ::	GUACAUGAAGCAGCAACUUCA	Cleavage		1
osa-miR444d.2	OsHDZ13	5	-1	1	21	390	410	UGCAGUUGCUGCCUCAAGCUU	: :: :::::::.:: ::	GUACAUGCGGCAGCAGCUCCA	Cleavage		1
osa-miR444e	OsHDZ9	5	-1	1	21	375	395	UGCAGUUGCUGCCUCAAGCUU	: :: : :::::.:::::	CCACAUGCGACAGCAGCUGCA	Cleavage		1
osa-miR444e	OsHDZ37	5	-1	1	21	381	401	UGCAGUUGCUGCCUCAAGCUU	: ::: ::::::::: ::	GUACAUGAAGCAGCAACUUCA	Cleavage		1
osa-miR444e	OsHDZ13	5	-1	1	21	390	410	UGCAGUUGCUGCCUCAAGCUU	: :: :::::::.:: ::	GUACAUGCGGCAGCAGCUCCA	Cleavage		1
osa-miR5075	OsHDZ37	5	-1	1	20	1	20	UUCUCCGUCGCCGCCGUCCG	:.::::::::..:: ::	AUGGCGGCGGCGGUGGCGAU	Cleavage		2
osa-miR5075	OsHDZ13	5	-1	1	20	1	20	UUCUCCGUCGCCGCCGUCCG	:.:::::::::.:: :.	AUGGCGGCGGCGAUGGUGGC	Cleavage		1
osa-miR5075	OsHDZ40	5	-1	1	21	3	23	UUCUCCGUCGCCGCCGUCCGC	.::::::::..::.:..	GGCAGCGGCGGCGGUGGGGGG	Cleavage		1
osa-miR5144-3p	OsHDZ40	5	-1	1	21	523	544	UCUCCUCAGCAGCA-CAAGAAG	::::: : : .:::::::::::	CUUCUCGCUAUUGCUGAGGAGA	Cleavage		1
osa-miR535-3p	OsHDZ9	5	-1	1	21	12	32	GUGCUUUCUCCCGUUGUCACU	::::.:::.: :::..::.:	AGUGGCAAUGCGAGGGAGUAG	Translation		1
osa-miR5538	OsHDZ9	5	-1	1	22	538	559	ACUGAACUCAAUCACUUGCUGC	:::: : ::::::.:: :::	ACAGCUAUUGAUUGGGUCCAGA	Cleavage		1
osa-miR5794	OsHDZ13	5	-1	1	21	1921	1941	UGAGGAAUCACUAGUAGUCGU	:.:: ::::::: ::::.	CGGGCUUCUAGUGACACCUCG	Cleavage		1
osa-miR5832	OsHDZ9	5	-1	1	21	160	180	UUGGCGGAGCGGUUGCUGUCA	:.:::::::.::: ::. :.	AGGCAGCAACUGCUGCGUGAG	Cleavage		1
osa-miR6246	OsHDZ37	5	-1	1	23	2325	2347	UUGGGGAUUUCCUGCCGGAGGAA	::::.:::::. :::.:	UGAAGCCGGUAGGAAGGCCCUAU	Cleavage		1

## Sheet: miRNA-network
miRNA_Acc.	Target_Acc.
osa-miR166a-3p	OsHDZ40
osa-miR166a-3p	OsHDZ37
osa-miR166a-3p	OsHDZ13
osa-miR166a-3p	OsHDZ9
osa-miR166b-3p	OsHDZ13
osa-miR166b-3p	OsHDZ9
osa-miR166b-3p	OsHDZ40
osa-miR166b-3p	OsHDZ37
osa-miR166c-3p	OsHDZ13
osa-miR166c-3p	OsHDZ9
osa-miR166c-3p	OsHDZ37
osa-miR166c-3p	OsHDZ40
osa-miR166d-3p	OsHDZ13
osa-miR166d-3p	OsHDZ9
osa-miR166d-3p	OsHDZ37
osa-miR166d-3p	OsHDZ40
osa-miR166f	OsHDZ37
osa-miR166f	OsHDZ9
osa-miR166f	OsHDZ13
osa-miR166f	OsHDZ40
osa-miR166g-3p	OsHDZ9
osa-miR166g-3p	OsHDZ37
osa-miR166g-3p	OsHDZ13
osa-miR166g-3p	OsHDZ40
osa-miR166h-3p	OsHDZ13
osa-miR166h-3p	OsHDZ40
osa-miR166h-3p	OsHDZ37
osa-miR166h-3p	OsHDZ9
osa-miR166j-3p	OsHDZ40
osa-miR166j-3p	OsHDZ9
osa-miR166j-3p	OsHDZ13
osa-miR166j-3p	OsHDZ37
osa-miR166m	OsHDZ9
osa-miR166m	OsHDZ40
osa-miR166m	OsHDZ37
osa-miR166m	OsHDZ13
osa-miR166i-3p	OsHDZ9
osa-miR166i-3p	OsHDZ40
osa-miR166i-3p	OsHDZ37
osa-miR166i-3p	OsHDZ13
osa-miR166k-3p	OsHDZ40
osa-miR166k-3p	OsHDZ37
osa-miR166k-3p	OsHDZ9
osa-miR166k-3p	OsHDZ13
osa-miR166l-3p	OsHDZ37
osa-miR166l-3p	OsHDZ13
osa-miR166l-3p	OsHDZ9
osa-miR166l-3p	OsHDZ40
osa-miR166e-3p	OsHDZ13
osa-miR166e-3p	OsHDZ9
osa-miR166e-3p	OsHDZ40
osa-miR166e-3p	OsHDZ37
osa-miR414	OsHDZ13
osa-miR5154	OsHDZ9
osa-miR1854-3p	OsHDZ9
osa-miR408-5p	OsHDZ37
osa-miR444b.2	OsHDZ9
osa-miR444c.2	OsHDZ9
osa-miR5075	OsHDZ37
osa-miR159f	OsHDZ9
osa-miR1847.1	OsHDZ40
osa-miR1883a	OsHDZ37
osa-miR1883b	OsHDZ37
osa-miR5158	OsHDZ9
osa-miR5340	OsHDZ40
osa-miR5508	OsHDZ37
osa-miR5508	OsHDZ9
osa-miR5832	OsHDZ37
osa-miR815a	OsHDZ9
osa-miR815b	OsHDZ9
osa-miR815c	OsHDZ9
osa-miR1429-3p	OsHDZ13
osa-miR159a.1	OsHDZ9
osa-miR159b	OsHDZ9
osa-miR164a	OsHDZ13
osa-miR164b	OsHDZ13
osa-miR164d	OsHDZ13
osa-miR164e	OsHDZ13
osa-miR164f	OsHDZ13
osa-miR169r-3p	OsHDZ13
osa-miR1850.2	OsHDZ9
osa-miR1865-3p	OsHDZ40
osa-miR2093-5p	OsHDZ9
osa-miR2275d	OsHDZ40
osa-miR2275d	OsHDZ13
osa-miR2877	OsHDZ13
osa-miR2927	OsHDZ13
osa-miR395f	OsHDZ9
osa-miR444a-3p.2	OsHDZ9
osa-miR444a-3p.2	OsHDZ37
osa-miR444a-3p.2	OsHDZ13
osa-miR444b.1	OsHDZ13
osa-miR444b.1	OsHDZ40
osa-miR444c.1	OsHDZ13
osa-miR444c.1	OsHDZ40
osa-miR444d.2	OsHDZ9
osa-miR444d.2	OsHDZ37
osa-miR444d.2	OsHDZ13
osa-miR444e	OsHDZ9
osa-miR444e	OsHDZ37
osa-miR444e	OsHDZ13
osa-miR5075	OsHDZ37
osa-miR5075	OsHDZ13
osa-miR5075	OsHDZ40
osa-miR5144-3p	OsHDZ40
osa-miR535-3p	OsHDZ9
osa-miR5538	OsHDZ9
osa-miR5794	OsHDZ13
osa-miR5832	OsHDZ9
osa-miR6246	OsHDZ37
